# Supplementary material
Source: publisher site journal article supplement (https://www.dovepress.com/article/578276)
Supplement: Supplementary file 1 [file 578276_Supplementary%20Materials%20%25281%2529.docx]

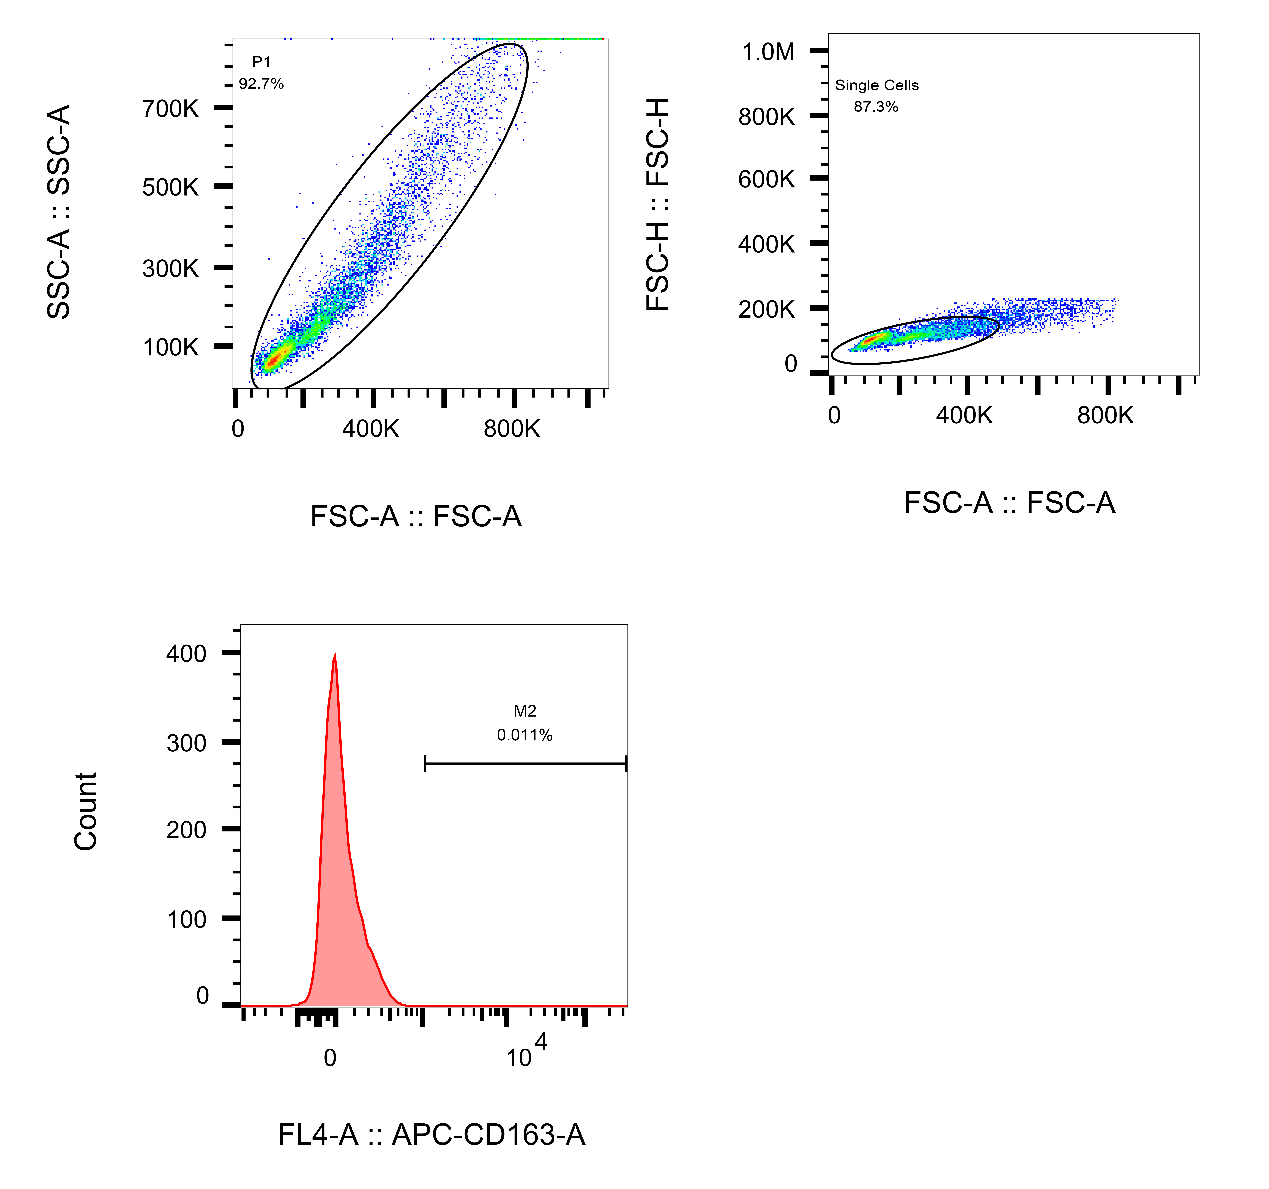


**Supplementary Figure 1.**
Sequential gating strategy for flow cytometric identification of macrophage populations. Debris was excluded based on FSC/SSC, followed by singlet discrimination and live-cell gating. Macrophages were identified as CD11b⁺F4/80⁺ cells, and M2 macrophages were defined as CD206⁺ cells.


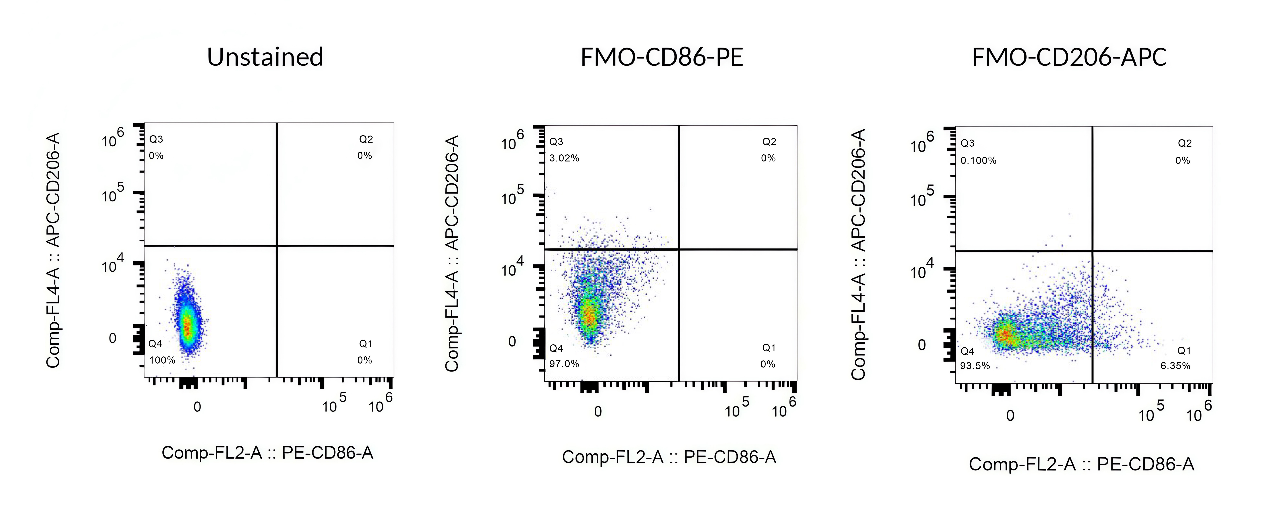


**Supplementary Figure 2.**
Flow cytometric gating strategy for tumor-infiltrating macrophages. Tumor tissues were dissociated into single-cell suspensions, and cell viability was assessed after dissociation, with >95% viable cells prior to staining. For flow cytometric analysis, cells were fixed and permeabilized for intracellular staining. Live/dead discrimination using 7-AAD was applied during data analysis to exclude debris and non-specific events, followed by gating on CD11b⁺F4/80⁺ macrophages.
